# Supplementary material for: Proteomic Analysis of Mitochondrial-Associated ER Membranes (MAM) during RNA Virus Infection Reveals Dynamic Changes in Protein and Organelle Trafficking
Source: PubMed Central journal article supplement (PMC4348417; doi:10.1371/journal.pone.0117963), 2015-03-03
Supplement: pone.0117963.s005.pdf [file pone.0117963.s005.pdf]

| HCV       |           | SenV      |           |
|-----------|-----------|-----------|-----------|
| Enter MAM | Leave MAM | Enter MAM | Leave MAM |
| A2M       | ABCB1     | ABCC1     | AAAS      |
| AARS      | ABCB6     | ABCD3     | ABCE1     |
| ABCE1     | ABCD3     | ACADVL    | ACTR2     |
| ACBD5     | ABHD10    | ACAT1     | AKAP2     |
| ACSL1     | ACAA2     | ACO2      | ALPP      |
| ACSL4     | ACAD9     | ACOX1     | ANLN      |
| ACTN1     | ACADM     | ACSL3     | AP2A1     |
| ACTN4     | ACADSB    | ADAM9     | AP2B1     |
| ADD1      | ACADVL    | AGPS      | APEX1     |
| ADFP      | ACO2      | AGR2      | APOBEC3B  |
| AGT       | ADAM9     | AGTRAP    | ARHGAP17  |
| ALDH1A1   | ADAR      | ALDH18A   | ATAD3C    |
| APEX1     | AFG3L2    | 1         | ATP2B4    |
| ARF6      | AFP       | ALDH1B1   | ATP6AP1   |
| ARHGAP5   | AGK       | ALG1      | BAIAP2    |
| ASAH1     | AGMAT     | ANPEP     | BAZ1A     |
| ATP2B4    | AGRN      | ANXA1     | BAZ1B     |
| ATXN2     | AHSG      | ANXA4     | BUD31     |
| BAIAP2L1  | AIFM1     | ANXA6     | C20orf20  |
| BCAM      | AK2       | APOL2     | C8orf55   |
| BIN1      | AK3L1     | ARF6      | CHD4      |
| CALD1     | ALDH16A1  | ATP1A1    | CHD7      |
| CALU      | ALDH18A1  | ATP1B1    | CHST12    |
| CAP1      | ALDH1B1   | ATP2B1    | CKAP5     |
| CAT       | ALDH2     | ATP6V1B   | CSNK1A1   |
| CD38      | ALDH4A1   | 1         | CSR1P     |
| CDC42EP4  | AMFR      | B4GALT5   | CSTF3     |
| CDK5RAP3  | AMT       | BST2      | CUX1      |
| CEACAM1   | ANPEP     | C11orf59  | DDX21     |
| CFL1      | APP       | C14orf15  | DEK       |
| CHD4      | ATAD3A    | 6         | DHRS7B    |
| CKAP5     | ATP1A1    | C1QBP     | DNAJB12   |
| COBLL1    | ATP2A2    | C3orf21   | DNAJC3    |
| COL18A1   | ATP5A1    | C4B       | DNMT1     |
| CORO1B    | ATP5B     | CAT       | DOCK5     |
| CPVL      | ATP5D     | CD109     | DPY30     |
| CRELD1    | ATP5F1    | CD276     | DYNC1H1   |
| CRELD2    | ATP5H     | CDCP1     | DYNC1I2   |
| CSR1P     | ATP5J     | CHID1     | DYNC1LI2  |
| CTNNAL1   | ATP5L     | CKAP4     | DYNLT1    |
| CTSB      | ATP5O     | CLPTM1L   | EDF1      |

| HCV       |           | SenV      |           |
|-----------|-----------|-----------|-----------|
| Enter MAM | Leave MAM | Enter MAM | Leave MAM |
| CYP51A1   | ATP6V0A1  | CNP       | EEF1A1    |
| DGAT1     | B3GNT1    | CORO1A    | EEF1B2    |
| DMD       | B4GALT1   | COX5A     | EEF1D     |
| DNAJC1    | BCL2L13   | COX7A2    | EEF1G     |
| DNAJC2    | C14orf156 | CPNE2     | EIF3F     |
| DNM2      | C1QBP     | CPNE3     | EIF4A3    |
| DPM1      | C5orf33   | CPT1A     | ELAVL1    |
| DPP3      | CANX      | CTSD      | EPN2      |
| DTNA      | CCDC109A  | CYBRD1    | ERCC6L    |
| DYNC1H1   | CCPG1     | DAD1      | EXOC2     |
| DYNC1I2   | CDH2      | DAP3      | EXOC3     |
| DYNC1LI1  | CHST13    | DCBLD2    | EZR       |
| DYNC1LI2  | CLDN1     | DDOST     | FAM82A2   |
| DYNLT1    | CLGN      | DNAJB11   | FBL       |
| EEF1A1    | COL5A2    | DNAJC9    | FLOT1     |
| EEF1B2    | COX5A     | DPM1      | FUBP1     |
| EEF1D     | COX6B1    | DSG2      | FUBP3     |
| EEF1G     | CPD       | DYSF      | G3BP1     |
| EEF2      | CPT2      | ECHS1     | GANAB     |
| EIF5A     | CTAGE5    | EDIL3     | GLYR1     |
| EML4      | CTGF      | EEA1      | GNA12     |
| ENAH      | CYB5R1    | F3        | GNB2L1    |
| EPB41     | CYC1      | FAM3C     | GTF2I     |
| EPB41L5   | DAGLB     | FAR1      | GTF3C1    |
| EPCAM     | DAP3      | FH        | H2AFV     |
| EPS8L2    | DDX21     | FKBP8     | H2AFX     |
| ERLIN1    | DHCR24    | FLNB      | H2AFY     |
| ERLIN2    | DHX30     | FNDC3B    | HIP1      |
| ERO1L     | DHX9      | GBA       | HIST1H2BJ |
| ESD       | DLAT      | GCS1      | HIST1H3C  |
| EZR       | DLD       | GNA13     | HIST1H4H  |
| F2        | DNAJC10   | GNAI1     | HIST2H3A  |
| FADS1     | DNAJC11   | GNB2      | HMGA2     |
| FARP1     | DNAJC13   | GNB4      | HMGB1     |
| FASN      | DSP       | GNG12     | HMGB2     |
| FERMT2    | EBP       | GNPAT     | HMGB3     |
| FGB       | ECE1      | GOLGA5    | HMGN1     |
| FGG       | ECH1      | GPSN2     | HMHA1     |
| FKBP11    | EFTUD2    | GRN       | HNRNPK    |
| GAPDH     | EHHADH    | GRPEL1    | HNRNPM    |
| GC        | ELOVL1    | HADHA     | HNRNPUL2  |

| HCV         |           | SenV      |            |
|-------------|-----------|-----------|------------|
| Enter MAM   | Leave MAM | Enter MAM | Leave MAM  |
| GCN1L1      | ENPP1     | HCCS      | HNRPLL     |
| GNAI2       | ERMP1     | SRP9      | HSPA14     |
| GNAL        | ETFA      | HIBADH    | IFITM3     |
| GNAQ        | ETFB      | HLA-B     | KANK2      |
| GNAS        | FAM38A    | HMOX1     | KHSRP      |
| GNB2L1      | FAM62A    | HMOX2     | KIAA0415   |
| GOLM1       | FAM82A2   | HS2ST1    | KIF11      |
| GPI         | FGFR4     | HSD17B4   | KIF18B     |
| H6PD        | FLOT1     | HSPA13    | KIF4A      |
| HCV-RNA-Pol | FLOT2     | HSPA9     | KTELC1     |
| HDLBP       | FLVCR1    | HSPD1     | LGALS3     |
| HMGB3       | FN1       | ICAM1     | LIMS1      |
| HMGCS1      | FOXRED1   | IER3IP1   | LMNA       |
| HMHA1       | GALNT2    | IGF2R     | LMNB1      |
| HN1L        | GFM1      | ITGA5     | LOC1001312 |
| HSD17B2     | GJA1      | ITGB4     | 94         |
| HSP90AA1    | GLDC      | ITM2C     | LOC649330  |
| HSP90AB1    | GLG1      | ITPR1     | LRRC8E     |
| HSP90B1     | GLS       | JAGN1     | MAP1S      |
| HSPA5       | GLTPD2    | JUP       | MBD3       |
| HYOU1       | GLUD1     | KIAA0090  | MDC1       |
| IQGAP1      | GOLIM4    | KIAA0776  | MGMT       |
| IQGAP2      | GOT2      | KIAA1949  | MKI67      |
| ITIH2       | GPD2      | KIRREL    | MPRIP      |
| KANK4       | GRHPR     | KRTCAP2   | MSH6       |
| KIAA0776    | GRPEL1    | LDLR      | MSN        |
| KIAA1715    | GSTK1     | LGALS3B   | MYADM      |
| KIF21A      | GTF3C1    | P         | MYBBP1A    |
| KRT1        | H2AFV     | LGALS8    | MYH10      |
| KRT10       | H2AFY     | LGMN      | MYO1C      |
| KRT2        | HEATR1    | MKKS      | MYO5A      |
| LEPRE1      | HINT2     | LOC7279   | MYST2      |
| LMAN1       | HIST1H1B  | 47        | NCAPD3     |
| LMO7        | HIST1H1E  | LONP1     | NDUFA10    |
| MARCKSL1    | HIST1H2BJ | LRRC59    | NDUFS8     |
| MEGF9       | HIST1H4H  | MDH2      | NHP2L1     |
| MTHFD1      | HIST2H2AA | MEST      | NOC2L      |
| MTPN        | 4         | MGAT4B    | NOLC1      |
| MYH10       | HM13      | MOXD1     | NUMA1      |
| MYH14       | HMGCL     | MPP6      | NUP210     |
| MYO1D       | HNF4A     | MRC2      | NUP214     |

| HCV       |           | SenV      |           |
|-----------|-----------|-----------|-----------|
| Enter MAM | Leave MAM | Enter MAM | Leave MAM |
| NARS      | HNRNPA0   | MRPL10    | ORC3L     |
| NFXL1     | HNRNPC    | MRPS30    | PARP1     |
| NS3       | HNRNPD    | NAP1L1    | PARVA     |
| PARP1     | HNRNPUL2  | NCAM2     | PCBP2     |
| PDE8A     | HSD17B10  | NDUFS1    | PDIA6     |
| PDIA3     | HSPA9     | NDUFS3    | PDS5A     |
| PDIA4     | HSPD1     | NDUFV2    | PIPSL     |
| PDIA6     | HSPE1     | NFKB2     | PLCB3     |
| PDLIM1    | IARS2     | NRP2      | POFUT1    |
| PDLIM5    | IDH2      | NUP62     | PPAP2C    |
| PDS5A     | IDH3A     | OAS1      | PPP2R1A   |
| PEBP1     | IDH3B     | OAT       | PRKACA    |
| PECAM1    | IGF2R     | OSBPL8    | PRKDC     |
| PHIP      | IKIP      | P4HA1     | PRPF8     |
| PHYH      | IL1RAP    | PARP14    | PSIP1     |
| PLCB1     | IMMT      | PBXIP1    | PSPC1     |
| PLS3      | ISOC2     | PDP1      | PTBP1     |
| PLXND1    | ITGA1     | PECI      | PTRF      |
| PPFIA1    | ITGAV     | PEX11B    | PXDN      |
| PPP1CB    | ITM2B     | PEX14     | RAB10     |
| PRDX1     | KIAA0564  | PGRMC2    | RAB32     |
| PRDX4     | KIAA2013  | PHB2      | RAB5B     |
| PRKAA1    | LACTB     | PI4K2A    | RAD50     |
| PROS1     | LDLR      | PLAUR     | RAI14     |
| QDPR      | LETM1     | PLOD1     | RBM14     |
| RCC2      | LMNA      | PLSCR1    | RBM3      |
| RDX       | LMNB2     | PPIF      | RCC1      |
| RECQL     | LONP1     | PPL       | RCC2      |
| RPL13A    | LPHN2     | PRDX3     | RECQL     |
| RPL26     | LRP1      | PSAP      | RFC1      |
| RPS16     | LRPAP1    | PSEN1     | RFC4      |
| RPS17     | LRPPRC    | PTGFRN    | RFC5      |
| RPS2      | LRRC8A    | PTRH2     | RHOT1     |
| RPS3      | MAN2A1    | PTTG1IP   | RIF1      |
| RPS6KA3   | MAVS      | RAB18     | RPL39     |
| SDF2L1    | MCCC1     | RAB1B     | RPS10     |
| SEC31A    | MCCC2     | RAB3D     | RPS12     |
| SEP11     | MDH2      | RAB5C     | RPS16     |
| SEP7      | ME2       | RHOC      | RSPRY1    |
| SEP9      | MFN1      | RPL10A    | SAFB      |
| SLC27A2   | MFN2      | RPL36     | SCRIB     |

| HCV       |           | SenV      |           |
|-----------|-----------|-----------|-----------|
| Enter MAM | Leave MAM | Enter MAM | Leave MAM |
| SLC9A3R1  | MGAT1     | S100A10   | SEP9      |
| SMPDL3B   | MKI67     | S100A13   | SFPQ      |
| SNTB1     | MLEC      | SACM1L    | SH3BP4    |
| SORD      | MMAB      | SCARB1    | SLC12A9   |
| SPTAN1    | MRPL1     | SCP2      | SLC19A1   |
| SRGAP2    | MRPL11    | SDC4      | SLC1A4    |
| SRPR      | MRPL12    | SEC63     | SLC27A3   |
| STIM1     | MRPL37    | SERPINH   | SLC39A14  |
| SUMO2     | MRPL41    | 1         | SMARCA4   |
| TLN1      | MRPL46    | SLC12A7   | SMARCA5   |
| TPM3      | MRPL49    | SLC25A1   | SMARCC2   |
| TPM4      | MRPS27    | SLC38A1   | SMC1A     |
| TRAM1     | MRPS31    | SPTLC1    | SMC2      |
| TUBA1C    | MTCH2     | SPTLC2    | SMC3      |
| UBA1      | MTHFD1L   | SQRDL     | SMCHD1    |
| UGCGL1    | MTX1      | SRPR      | STAG1     |
| UTRN      | MTX2      | STARD3N   | STK24     |
| VARS      | MYO6      | L         | SUMF2     |
| VASP      | NCEH1     | STOM      | SUMO2     |
| VAT1      | NDUFA10   | STT3A     | SUPT16H   |
| VCL       | NDUFA5    | SYNGR2    | TGFB1     |
| VIL1      | NDUFA9    | TAP1      | TGFBI     |
| VSNL1     | NDUFB10   | TAP2      | TJP1      |
| WASF2     | NDUFS1    | TAX1BP3   | TLN1      |
| WDR1      | NDUFS2    | TCIRG1    | TMED9     |
| ZDHHC5    | NDUFS3    | TGM6      | TMEM41A   |
|           | NDUFV1    | THBS1     | TOMM40    |
|           | NIPSNAP1  | THEM2     | TOP2A     |
|           | NOMO2     | TIMM44    | TOR1A     |
|           | NSDHL     | TIMM50    | TOR1AIP1  |
|           | NXF1      | TMED1     | TRIP12    |
|           | OAT       | TMED5     | TRRAP     |
|           | OGDH      | TMED7     | TUBG1     |
|           | OPA1      | TMEM16    | UACA      |
|           | OSBPL3    | 5         | UBTD1     |
|           | PC        | TMEM43    | UHRF1     |
|           | PCYOX1    | TNC       | UNC84B    |
|           | PDHA1     | TOMM70    | UTRN      |
|           | PDPR      | A         | VIM       |
|           | PECR      | TSPAN14   | WAPAL     |
|           | PEX13     | TUFM      | WASL      |
|           |           | TXNDC3    |           |

| HCV       |           | SenV      |           |
|-----------|-----------|-----------|-----------|
| Enter MAM | Leave MAM | Enter MAM | Leave MAM |
|           | PHB       | VAMP3     | WIZ       |
|           | PHB2      | YARS2     | WWC2      |
|           | PICALM    |           | XRCC6     |
|           | PITRM1    |           | ZMYM3     |
|           | PKP2      |           | ZNF828    |
|           | PLXNB2    |           |           |
|           | PMPCB     |           |           |
|           | POFUT2    |           |           |
|           | POLDIP2   |           |           |
|           | POLRMT    |           |           |
|           | PON2      |           |           |
|           | PPA2      |           |           |
|           | PRDX3     |           |           |
|           | PROM1     |           |           |
|           | PSAP      |           |           |
|           | PSEN1     |           |           |
|           | PSIP1     |           |           |
|           | PTCD3     |           |           |
|           | PTGES2    |           |           |
|           | PTPRF     |           |           |
|           | PTTG1IP   |           |           |
|           | PVRL2     |           |           |
|           | PYCR2     |           |           |
|           | QSOX2     |           |           |
|           | RAB1B     |           |           |
|           | RAB6C     |           |           |
|           | RDH13     |           |           |
|           | RETSAT    |           |           |
|           | RG9MTD1   |           |           |
|           | RHOT2     |           |           |
|           | RPN1      |           |           |
|           | RPN2      |           |           |
|           | SACM1L    |           |           |
|           | SARS2     |           |           |
|           | SCAMP2    |           |           |
|           | SCAMP3    |           |           |
|           | SDF4      |           |           |
|           | SDHA      |           |           |
|           | SEC11A    |           |           |
|           | SEC62     |           |           |
|           | SERINC1   |           |           |

| HCV       |           | SenV      |           |
|-----------|-----------|-----------|-----------|
| Enter MAM | Leave MAM | Enter MAM | Leave MAM |
|           | SFXN1     |           |           |
|           | SHMT2     |           |           |
|           | SLC1A5    |           |           |
|           | SLC25A1   |           |           |
|           | SLC25A11  |           |           |
|           | SLC25A13  |           |           |
|           | SLC25A24  |           |           |
|           | SLC25A5   |           |           |
|           | SLC35B2   |           |           |
|           | SLC38A2   |           |           |
|           | SLC4A11   |           |           |
|           | SLC4A7    |           |           |
|           | SMARCC1   |           |           |
|           | SMARCC2   |           |           |
|           | SMARCD2   |           |           |
|           | SMPD4     |           |           |
|           | SOD2      |           |           |
|           | SPTLC1    |           |           |
|           | SQRDL     |           |           |
|           | ST6GAL1   |           |           |
|           | STOML2    |           |           |
|           | STX12     |           |           |
|           | SURF4     |           |           |
|           | TBL2      |           |           |
|           | TBRG4     |           |           |
|           | TFAM      |           |           |
|           | TFRC      |           |           |
|           | TJP1      |           |           |
|           | TM9SF1    |           |           |
|           | TM9SF4    |           |           |
|           | TMED10    |           |           |
|           | TMEM111   |           |           |
|           | TMEM126   |           |           |
|           | A         |           |           |
|           | TMEM176   |           |           |
|           | B         |           |           |
|           | TMEM43    |           |           |
|           | TOMM40    |           |           |
|           | TOMM70A   |           |           |
|           | TOP2A     |           |           |
|           | TOP2B     |           |           |

| <b>HCV</b>       |                                                                                                                              | <b>SenV</b>      |                  |
|------------------|------------------------------------------------------------------------------------------------------------------------------|------------------|------------------|
| <b>Enter MAM</b> | <b>Leave MAM</b>                                                                                                             | <b>Enter MAM</b> | <b>Leave MAM</b> |
|                  | TRAP1<br>TSFM<br>TSPAN13<br>TST<br>TUFM<br>UQCRB<br>UQCRC1<br>UQCRC2<br>VDAC1<br>VDAC2<br>VDAC3<br>WFS1<br>XPNPEP3<br>YME1L1 |                  |                  |
